# Supplementary material for: Green Information Systems wirksam einsetzen
Source: Springer Nature journal article supplement (doi:10.1007/s11576-013-0379-x), 2013-08-26
Supplement: 11576_2013_379_MOESM1_ESM.pdf [file 11576_2013_379_MOESM1_ESM.pdf]

**Green Information Systems wirksam einsetzen –  
Die Entwicklung eines IT-Artefakts für die Erfassung und Analyse  
von Treibhausgasemissionen in der Logistik**

**Hendrik Hilpert, Johann Kranz, Matthias Schumann**

WIRTSCHAFTSINFORMATIK (2013) 55(5)

**Anhang (verfügbar online über <http://link.springer.com>)**

## Analyze Track 132

|                 |          |                            |            |           |                         |
|-----------------|----------|----------------------------|------------|-----------|-------------------------|
| Maximum Speed:  | 69 km/h  | Average Speed:             | 54.8 km/h  | Duration: | 0h 1m 40s               |
| Maximum RPM:    | 5012 rpm | Average RPM:               | 3985.4 rpm | Distance: | 1.494 km                |
| Elevation Gain: | 10.0 m   | CO <sub>2</sub> -Emission: | 0.283 kg   | Driver:   | Driver 7 (personId: 15) |

[Analyze Driver 7](#) | [Hide Google Maps](#) | [View Raw Data](#) | [Csv Export](#)

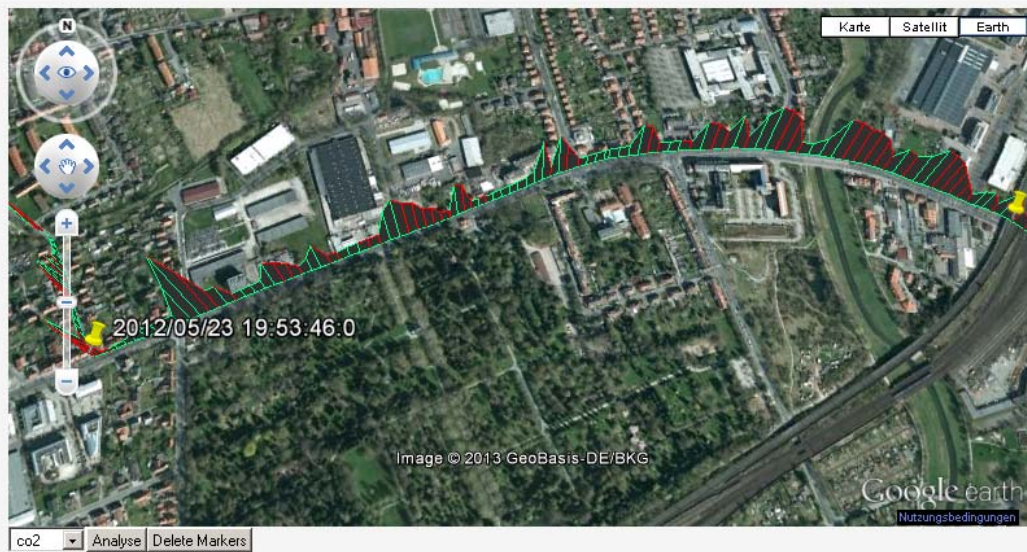

**Fig 7** Carbon Tracker - Visualisierung der Umweltbeeinträchtigung bei normalen Verkehrsbedingungen

## Analyze Track 130

|                 |          |                            |            |           |                         |
|-----------------|----------|----------------------------|------------|-----------|-------------------------|
| Maximum Speed:  | 74 km/h  | Average Speed:             | 37.0 km/h  | Duration: | 0h 2m 26s               |
| Maximum RPM:    | 4825 rpm | Average RPM:               | 2194.4 rpm | Distance: | 1.489 km                |
| Elevation Gain: | 5.0 m    | CO <sub>2</sub> -Emission: | 0.319 kg   | Driver:   | Driver 7 (personId: 15) |

[Analyze Driver 7](#) [Hide Google Maps](#) [View Raw Data](#) [Csv Export](#)

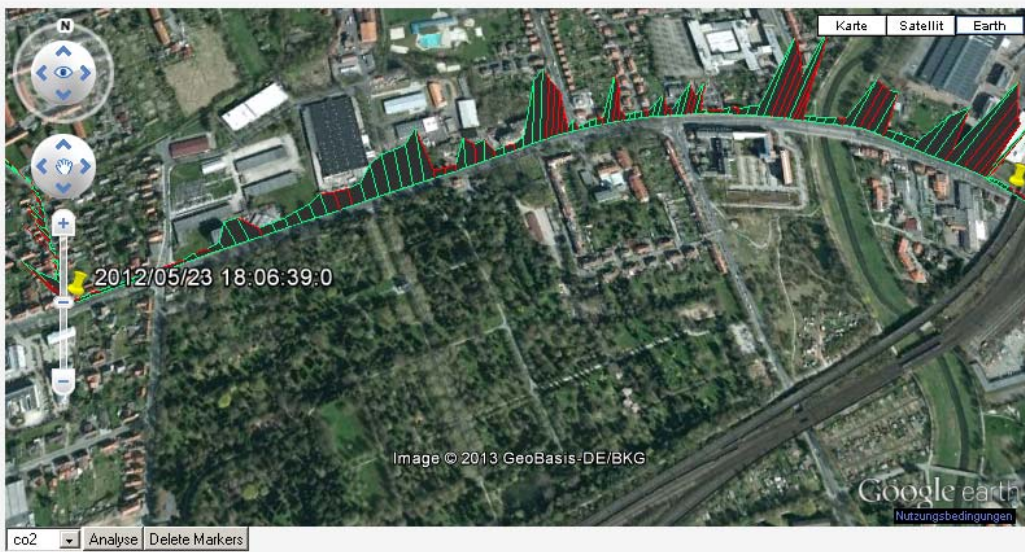

**Abb. 8** Carbon Tracker - Visualisierung der Umweltbeeinträchtigung in Verkehrsspitzenzeiten

## Analyze Track 124

|                 |          |                            |            |           |                         |
|-----------------|----------|----------------------------|------------|-----------|-------------------------|
| Maximum Speed:  | 58 km/h  | Average Speed:             | 18.3 km/h  | Duration: | 0h 1m 36s               |
| Maximum RPM:    | 4461 rpm | Average RPM:               | 1493.5 rpm | Distance: | 0.516 km                |
| Elevation Gain: | 0.0 m    | CO <sub>2</sub> -Emission: | 0.134 kg   | Driver:   | Driver 7 (personId: 15) |

Analyze Driver 7 | Hide Google Maps | View Raw Data | Csv Export

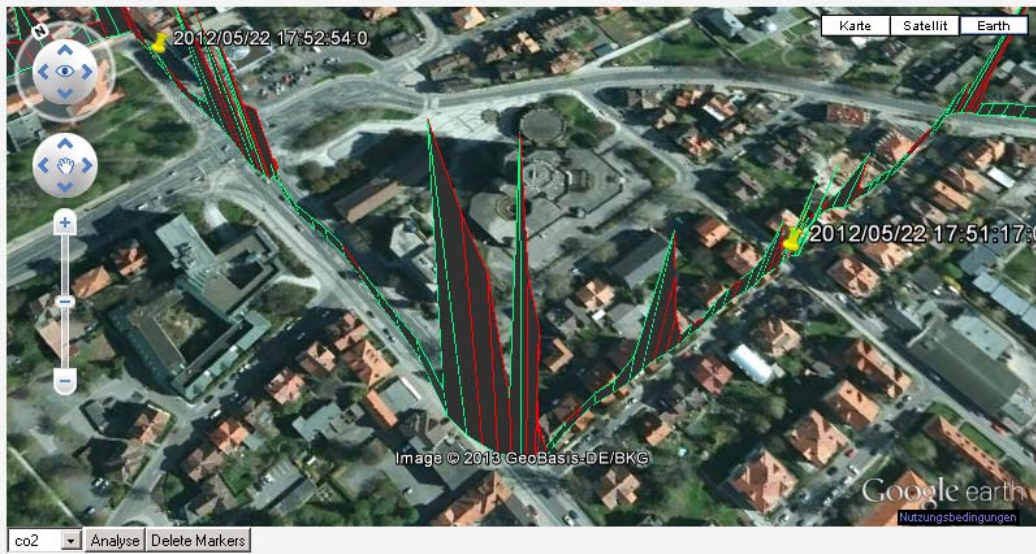

**Abb. 9** Carbon Tracker - Beispiel für wenig umweltbewusstes Fahrverhalten in Liefertour 124, Abschnitt S<sub>4,5</sub>
